# Supplementary material for: MRI based volumetric measurements of vestibular schwannomas in patients with neurofibromatosis type 2: comparison of three different software tools
Source: PubMed Central journal article supplement (PMC7360562; doi:10.1038/s41598-020-68489-y), 2020-07-14
Supplement: 41598_2020_68489_MOESM1_ESM.pdf [file 41598_2020_68489_MOESM1_ESM.pdf]

# **MRI based Volumetric Measurements of Vestibular Schwannomas in Patients with Neurofibromatosis Type 2: Comparison of Three Different Software Tools**

Philipp Kollmann<sup>1</sup>, Victor-Felix Mautner<sup>1</sup>, Johannes Koeppen<sup>2</sup>, Ralph Wenzel<sup>3</sup>, Jan M. Friedman<sup>4</sup>, Johannes Salamon<sup>5</sup> and Said Farschtschi<sup>1</sup>

<sup>1</sup> University Medical Center Hamburg-Eppendorf, Dept. Of Neurology, Hamburg, Germany

<sup>2</sup> University Medical Center Hamburg-Eppendorf, Dept. Of Neurosurgery, Hamburg, Germany

<sup>3</sup> Radiological Practice Altona, Hamburg, Germany

<sup>4</sup> University of British Columbia, Dept of Medical Genetics, Vancouver, Canada

<sup>5</sup> University Medical Center Hamburg-Eppendorf, Department of Diagnostic and Interventional Radiology and Nuclear Medicine Dept. Of Radiology, Hamburg, Germany

## **Supplementary tables**

In the following section two supplementary tables to the above-named article are listed. The tables contain all results (i.e. volume calculation of tumors and phantoms); the collected data have been analyzed according to the protocol described in the methods section in the body of the main manuscript.

**Table S1: Tumors.** Volumes were calculated in triplicate with each of three different methods on images taken during four separate examinations about three months apart.

| Patient | Software | Exam | mean | standard deviation | coefficient of variation |
|---------|----------|------|------|--------------------|--------------------------|
| 1       | BrainLab | 1    | 3.51 | 0.02               | 0.01                     |
| 1       | BrainLab | 2    | 3.63 | 0.02               | 0.01                     |
| 1       | BrainLab | 3    | 3.71 | 0.13               | 0.03                     |
| 1       | BrainLab | 4    | 4.00 | 0.13               | 0.03                     |
| 1       | ITK.SNAP | 1    | 4.52 | 0.13               | 0.03                     |
| 1       | ITK.SNAP | 2    | 4.40 | 0.05               | 0.01                     |
| 1       | ITK.SNAP | 3    | 4.34 | 0.12               | 0.03                     |
| 1       | ITK.SNAP | 4    | 4.42 | 0.07               | 0.02                     |
| 1       | Osirix   | 1    | 3.77 | 0.09               | 0.02                     |
| 1       | Osirix   | 2    | 3.96 | 0.01               | 0.00                     |
| 1       | Osirix   | 3    | 3.98 | 0.04               | 0.01                     |
| 1       | Osirix   | 4    | 4.08 | 0.04               | 0.01                     |
| 2       | BrainLab | 1    | 5.16 | 0.10               | 0.02                     |
| 2       | BrainLab | 2    | 5.54 | 0.02               | 0.00                     |
| 2       | BrainLab | 3    | 5.36 | 0.01               | 0.00                     |
| 2       | BrainLab | 4    | 6.05 | 0.06               | 0.01                     |
| 2       | ITK.SNAP | 1    | 6.67 | 0.04               | 0.01                     |
| 2       | ITK.SNAP | 2    | 6.80 | 0.11               | 0.02                     |
| 2       | ITK.SNAP | 3    | 6.61 | 0.20               | 0.03                     |
| 2       | ITK.SNAP | 4    | 6.61 | 0.07               | 0.01                     |
| 2       | Osirix   | 1    | 5.80 | 0.05               | 0.01                     |
| 2       | Osirix   | 2    | 6.38 | 0.07               | 0.01                     |
| 2       | Osirix   | 3    | 6.62 | 0.07               | 0.01                     |
| 2       | Osirix   | 4    | 6.46 | 0.23               | 0.04                     |

| <b>Patient</b> | <b>Software</b> | <b>Exam</b> | <b>mean</b> | <b>standard deviation</b> | <b>coefficient of variation</b> |
|----------------|-----------------|-------------|-------------|---------------------------|---------------------------------|
| 3              | BrainLab        | 1           | 3.17        | 0.04                      | 0.01                            |
| 3              | BrainLab        | 2           | 2.75        | 0.06                      | 0.02                            |
| 3              | BrainLab        | 3           | 3.03        | 0.06                      | 0.02                            |
| 3              | BrainLab        | 4           | 2.90        | 0.02                      | 0.01                            |
| 3              | ITK.SNAP        | 1           | 3.50        | 0.13                      | 0.04                            |
| 3              | ITK.SNAP        | 2           | 3.44        | 0.07                      | 0.02                            |
| 3              | ITK.SNAP        | 3           | 3.68        | 0.13                      | 0.03                            |
| 3              | ITK.SNAP        | 4           | 3.69        | 0.02                      | 0.00                            |
| 3              | Osirix          | 1           | 3.09        | 0.07                      | 0.02                            |
| 3              | Osirix          | 2           | 3.73        | 0.05                      | 0.01                            |
| 3              | Osirix          | 3           | 3.64        | 0.11                      | 0.03                            |
| 3              | Osirix          | 4           | 3.58        | 0.02                      | 0.00                            |
| 4              | BrainLab        | 1           | 7.90        | 0.02                      | 0.00                            |
| 4              | BrainLab        | 2           | 8.35        | 0.06                      | 0.01                            |
| 4              | BrainLab        | 3           | 12.35       | 0.18                      | 0.01                            |
| 4              | BrainLab        | 4           | 10.52       | 0.32                      | 0.03                            |
| 4              | ITK.SNAP        | 1           | 8.86        | 0.23                      | 0.03                            |
| 4              | ITK.SNAP        | 2           | 9.18        | 0.03                      | 0.00                            |
| 4              | ITK.SNAP        | 3           | 13.61       | 0.32                      | 0.02                            |
| 4              | ITK.SNAP        | 4           | 11.42       | 0.13                      | 0.01                            |
| 4              | Osirix          | 1           | 8.39        | 0.05                      | 0.01                            |
| 4              | Osirix          | 2           | 9.03        | 0.11                      | 0.01                            |
| 4              | Osirix          | 3           | 13.16       | 0.14                      | 0.01                            |
| 4              | Osirix          | 4           | 11.64       | 0.12                      | 0.01                            |

| <b>Patient</b> | <b>Software</b> | <b>Exam</b> | <b>mean</b> | <b>standard deviation</b> | <b>coefficient of variation</b> |
|----------------|-----------------|-------------|-------------|---------------------------|---------------------------------|
| 5              | BrainLab        | 1           | 0.400       | 0.010                     | 0.025                           |
| 5              | BrainLab        | 2           | 0.487       | 0.012                     | 0.024                           |
| 5              | BrainLab        | 3           | 0.500       | 0.010                     | 0.020                           |
| 5              | BrainLab        | 4           | 0.470       | 0.010                     | 0.021                           |
| 5              | ITK.SNAP        | 1           | 0.569       | 0.015                     | 0.025                           |
| 5              | ITK.SNAP        | 2           | 0.502       | 0.019                     | 0.037                           |
| 5              | ITK.SNAP        | 3           | 0.580       | 0.029                     | 0.050                           |
| 5              | ITK.SNAP        | 4           | 0.536       | 0.045                     | 0.084                           |
| 5              | Osirix          | 1           | 0.529       | 0.002                     | 0.004                           |
| 5              | Osirix          | 2           | 0.567       | 0.003                     | 0.006                           |
| 5              | Osirix          | 3           | 0.575       | 0.007                     | 0.012                           |
| 5              | Osirix          | 4           | 0.545       | 0.006                     | 0.011                           |
| 6              | BrainLab        | 1           | 0.494       | 0.025                     | 0.050                           |
| 6              | BrainLab        | 2           | 0.532       | 0.026                     | 0.049                           |
| 6              | BrainLab        | 3           | 0.559       | 0.043                     | 0.077                           |
| 6              | BrainLab        | 4           | 0.599       | 0.015                     | 0.026                           |
| 6              | ITK.SNAP        | 1           | 0.684       | 0.039                     | 0.058                           |
| 6              | ITK.SNAP        | 2           | 0.697       | 0.013                     | 0.019                           |
| 6              | ITK.SNAP        | 3           | 0.682       | 0.026                     | 0.038                           |
| 6              | ITK.SNAP        | 4           | 0.689       | 0.023                     | 0.033                           |
| 6              | Osirix          | 1           | 0.416       | 0.007                     | 0.018                           |
| 6              | Osirix          | 2           | 0.442       | 0.004                     | 0.010                           |
| 6              | Osirix          | 3           | 0.455       | 0.016                     | 0.035                           |
| 6              | Osirix          | 4           | 0.482       | 0.010                     | 0.020                           |

| <b>Patient</b> | <b>Software</b> | <b>Exam</b> | <b>mean</b> | <b>standard deviation</b> | <b>coefficient of variation</b> |
|----------------|-----------------|-------------|-------------|---------------------------|---------------------------------|
| 7              | BrainLab        | 1           | 0.281       | 0.014                     | 0.048                           |
| 7              | BrainLab        | 2           | 0.272       | 0.010                     | 0.038                           |
| 7              | BrainLab        | 3           | 0.300       | 0.002                     | 0.007                           |
| 7              | BrainLab        | 4           | 0.323       | 0.005                     | 0.015                           |
| 7              | ITK.SNAP        | 1           | 0.449       | 0.028                     | 0.063                           |
| 7              | ITK.SNAP        | 2           | 0.498       | 0.002                     | 0.005                           |
| 7              | ITK.SNAP        | 3           | 0.504       | 0.035                     | 0.070                           |
| 7              | ITK.SNAP        | 4           | 0.494       | 0.017                     | 0.035                           |
| 7              | Osirix          | 1           | 0.224       | 0.008                     | 0.034                           |
| 7              | Osirix          | 2           | 0.237       | 0.009                     | 0.040                           |
| 7              | Osirix          | 3           | 0.265       | 0.023                     | 0.088                           |
| 7              | Osirix          | 4           | 0.276       | 0.007                     | 0.025                           |
| 8              | BrainLab        | 1           | 0.222       | 0.018                     | 0.082                           |
| 8              | BrainLab        | 2           | 0.267       | 0.022                     | 0.081                           |
| 8              | BrainLab        | 3           | 0.268       | 0.017                     | 0.063                           |
| 8              | BrainLab        | 4           | 0.285       | 0.023                     | 0.081                           |
| 8              | ITK.SNAP        | 1           | 0.314       | 0.012                     | 0.039                           |
| 8              | ITK.SNAP        | 2           | 0.305       | 0.011                     | 0.035                           |
| 8              | ITK.SNAP        | 3           | 0.331       | 0.008                     | 0.025                           |
| 8              | ITK.SNAP        | 4           | 0.343       | 0.019                     | 0.055                           |
| 8              | Osirix          | 1           | 0.144       | 0.004                     | 0.030                           |
| 8              | Osirix          | 2           | 0.127       | 0.011                     | 0.087                           |
| 8              | Osirix          | 3           | 0.129       | 0.005                     | 0.041                           |
| 8              | Osirix          | 4           | 0.101       | 0.009                     | 0.085                           |

**Table S2: Phantoms.** Volumes were calculated in triplicate with each of three different methods.

| <b>Phantom</b> | <b>Software</b> | <b>mean</b> | <b>standard deviation</b> | <b>coefficient of variation</b> |
|----------------|-----------------|-------------|---------------------------|---------------------------------|
| 0.1            | BrainLab        | 0.102       | 0.004                     | 0.035                           |
| 0.1            | ITK.SNAP        | 0.156       | 0.013                     | 0.081                           |
| 0.1            | Osirix          | 0.097       | 0.003                     | 0.033                           |
| 0.2            | BrainLab        | 0.183       | 0.004                     | 0.023                           |
| 0.2            | ITK.SNAP        | 0.258       | 0.003                     | 0.012                           |
| 0.2            | Osirix          | 0.188       | 0.001                     | 0.006                           |
| 0.3            | BrainLab        | 0.303       | 0.007                     | 0.022                           |
| 0.3            | ITK.SNAP        | 0.380       | 0.016                     | 0.041                           |
| 0.3            | Osirix          | 0.296       | 0.002                     | 0.007                           |
| 0.4            | BrainLab        | 0.420       | 0.003                     | 0.007                           |
| 0.4            | ITK.SNAP        | 0.517       | 0.012                     | 0.024                           |
| 0.4            | Osirix          | 0.397       | 0.014                     | 0.035                           |
| 0.5            | BrainLab        | 0.495       | 0.013                     | 0.026                           |
| 0.5            | ITK.SNAP        | 0.603       | 0.007                     | 0.011                           |
| 0.5            | Osirix          | 0.490       | 0.001                     | 0.001                           |
| 0.7            | BrainLab        | 0.774       | 0.006                     | 0.008                           |
| 0.7            | ITK.SNAP        | 0.865       | 0.013                     | 0.015                           |
| 0.7            | Osirix          | 0.674       | 0.008                     | 0.011                           |
| 1              | BrainLab        | 0.69        | 0.08                      | 0.11                            |
| 1              | ITK.SNAP        | 0.97        | 0.01                      | 0.01                            |
| 1              | Osirix          | 0.69        | 0.09                      | 0.12                            |

| <b>Phantom</b> | <b>Software</b> | <b>mean</b> | <b>standard deviation</b> | <b>coefficient of variation</b> |
|----------------|-----------------|-------------|---------------------------|---------------------------------|
| 2              | BrainLab        | 1.77        | 0.16                      | 0.09                            |
| 2              | ITK.SNAP        | 2.25        | 0.07                      | 0.03                            |
| 2              | Osirix          | 1.67        | 0.20                      | 0.12                            |
| 3              | BrainLab        | 2.88        | 0.13                      | 0.04                            |
| 3              | ITK.SNAP        | 3.65        | 0.06                      | 0.02                            |
| 3              | Osirix          | 2.92        | 0.20                      | 0.07                            |
| 5              | BrainLab        | 4.73        | 0.14                      | 0.03                            |
| 5              | ITK.SNAP        | 6.06        | 0.39                      | 0.06                            |
| 5              | Osirix          | 4.94        | 0.24                      | 0.05                            |
| 8              | BrainLab        | 7.71        | 0.13                      | 0.02                            |
| 8              | ITK.SNAP        | 8.57        | 0.11                      | 0.01                            |
| 8              | Osirix          | 7.97        | 0.06                      | 0.01                            |
